# Supplementary material for: Female (Under) Representation in Exercise Thermoregulation Research
Source: PubMed Central journal article supplement (PMC8219822; doi:10.1186/s40798-021-00334-6), 2021-06-22
Supplement: 40798_2021_334_MOESM2_ESM.pdf [file 40798_2021_334_MOESM2_ESM.pdf]

**Title:** Female (Under) Representation in Exercise Thermoregulation Research

**Journal:** Sports Medicine Open

**Authors**

Kate P Hutchins<sup>1</sup>, David N Borg<sup>2</sup>, Aaron JE Bach<sup>3</sup>, Joshua J Bon<sup>4,5</sup>, Geoffrey M Minett<sup>1</sup>, Ian B Stewart<sup>1</sup>

**Affiliations**

<sup>1</sup>Queensland University of Technology (QUT), School of Exercise and Nutrition Sciences, Institute of Health and Biomedical Innovation, Brisbane, Australia.

<sup>2</sup>Griffith University, Menzies Health Institute Queensland, The Hopkins Centre, Brisbane, Australia.

<sup>3</sup>Griffith University, The National Climate Change Adaption Research Facility (NCCARF), Gold Coast, Australia.

<sup>4</sup>Queensland University of Technology (QUT), School of Mathematical Sciences, Brisbane, Australia.

<sup>5</sup>Australian Centre of Excellence for Mathematical and Statistical Frontiers (ACEMS), Brisbane, Australia.

**Corresponding Author**

Kate P Hutchins

Email: k.hutchins@qut.edu.au

**Supplementary 2.** Mean (95% credible interval) proportion of female participants included in exercise thermoregulation research between 2010 and 2019.

| Year | Mean   | 95% lower | 95% upper |
|------|--------|-----------|-----------|
| 2010 | 11.55% | 9.17%     | 14.29%    |
| 2011 | 12.14% | 9.98%     | 14.54%    |
| 2012 | 12.76% | 10.86%    | 14.84%    |
| 2013 | 13.40% | 11.75%    | 15.20%    |
| 2014 | 14.07% | 12.58%    | 15.67%    |
| 2015 | 14.77% | 13.35%    | 16.24%    |
| 2016 | 15.50% | 13.97%    | 17.06%    |
| 2017 | 16.25% | 14.48%    | 18.09%    |
| 2018 | 17.02% | 14.87%    | 19.26%    |
| 2019 | 17.82% | 15.22%    | 20.55%    |
