# Supplementary material for: Female (Under) Representation in Exercise Thermoregulation Research
Source: PubMed Central journal article supplement (PMC8219822; doi:10.1186/s40798-021-00334-6), 2021-06-22
Supplement: 40798_2021_334_MOESM3_ESM.pdf [file 40798_2021_334_MOESM3_ESM.pdf]

**Title:** Female (Under) Representation in Exercise Thermoregulation Research

**Journal:** Sports Medicine Open

**Authors**

Kate P Hutchins<sup>1</sup>, David N Borg<sup>2</sup>, Aaron JE Bach<sup>3</sup>, Joshua J Bon<sup>4,5</sup>, Geoffrey M Minett<sup>1</sup>, Ian B Stewart<sup>1</sup>

**Affiliations**

<sup>1</sup>Queensland University of Technology (QUT), School of Exercise and Nutrition Sciences, Institute of Health and Biomedical Innovation, Brisbane, Australia.

<sup>2</sup>Griffith University, Menzies Health Institute Queensland, The Hopkins Centre, Brisbane, Australia.

<sup>3</sup>Griffith University, The National Climate Change Adaption Research Facility (NCCARF), Gold Coast, Australia.

<sup>4</sup>Queensland University of Technology (QUT), School of Mathematical Sciences, Brisbane, Australia.

<sup>5</sup>Australian Centre of Excellence for Mathematical and Statistical Frontiers (ACEMS), Brisbane, Australia.

**Corresponding Author**

Kate P Hutchins

Email: k.hutchins@qut.edu.au

**Supplementary 3.** Mean (95% credible interval) parameter estimates from the zero- and one-inflated beta distribution model.

| Model component             | Parameter | Notation         | Mean  | 95% lower | 95% upper |
|-----------------------------|-----------|------------------|-------|-----------|-----------|
| logit( $E(y y \in (0,1))$ ) | Intercept | $\alpha_{(0,1)}$ | -0.53 | -0.71     | -0.36     |
|                             | Year      | $\beta_{(0,1)}$  | 0.01  | -0.02     | 0.04      |
| logit( $\Pr(y = 0)$ )       | Intercept | $\alpha_{\{0\}}$ | 1.17  | 0.93      | 1.42      |
|                             | Year      | $\beta_{\{0\}}$  | -0.07 | -0.11     | -0.03     |
| logit( $\Pr(y = 1)$ )       | Intercept | $\alpha_{\{1\}}$ | -1.50 | -2.04     | -0.99     |
|                             | Year      | $\beta_{\{1\}}$  | -0.01 | -0.10     | 0.07      |
| Shape                       | Shape     | $d$              | 1.77  | 1.63      | 1.90      |

Note. Regression coefficients are reported on the logit scale.

Pr = Probability

$d$  = Regression coefficient in the linear predictor for the sum of the two shape parameters in the beta distribution.
